# Supplementary material for: Data-driven development of the nationwide hip fracture registry in the Netherlands
Source: Springer Nature journal article supplement (doi:10.1007/s11657-022-01160-3), 2022-12-05
Supplement: MOESM1 [file 23790222]

**Supplemental Table 1. Current - and suggested additional- parameters of the Dutch Hip Fracture Audit Dataset**

| Variable                                                                             | Variable type | Format                | Options                                                                                                                                                                                    |
|--------------------------------------------------------------------------------------|---------------|-----------------------|--------------------------------------------------------------------------------------------------------------------------------------------------------------------------------------------|
| <i>Id</i>                                                                            | Patient       | Integer, 9 numbers    |                                                                                                                                                                                            |
| <i>Country</i>                                                                       | Patient       | Factor                | Option set with all countries of the world                                                                                                                                                 |
| <i>Social service number</i>                                                         | Patient       | Integer, 9 numbers    |                                                                                                                                                                                            |
| <i>Initials</i>                                                                      | Patient       | Text                  |                                                                                                                                                                                            |
| <i>Name</i>                                                                          | Patient       | Text                  |                                                                                                                                                                                            |
| <i>Surname</i>                                                                       | Patient       | Text                  |                                                                                                                                                                                            |
| <i>Name of Partner</i>                                                               | Patient       | Text                  |                                                                                                                                                                                            |
| <i>Postal code</i>                                                                   | Patient       | String                |                                                                                                                                                                                            |
| <i>Date of birth</i>                                                                 | Patient       | dd-mm-yyyy            |                                                                                                                                                                                            |
| <i>Sex</i>                                                                           | Patient       | Factor                | 1: Male, 2: Female, 7: Undefined                                                                                                                                                           |
| <i>Decease date (if applicable)</i>                                                  | Patient       | dd-mm-yyyy            |                                                                                                                                                                                            |
| <b>CLINICAL SECTION</b>                                                              |               |                       |                                                                                                                                                                                            |
| <i>Date and time of arrival in Emergency Room</i>                                    | Process       | dd-mm-yyyy hh:mm      |                                                                                                                                                                                            |
| <i>Specialty of practitioner in charge</i>                                           | Process       | Factor                | 5: Traumasurgeon, 6: Ortho-traumasurgeon, 7: surgeon, 8: Ortho-surgeon, 9: Geriatrician, 10: Internal medicine-elderly, 11: Internal medicine, 12: Nursing home physician                  |
| <i>Consulting specialty</i>                                                          | Process       | Factor                | 5: Traumasurgeon, 6: Ortho-traumasurgeon, 7: surgeon, 8: Ortho-surgeon, 9: Geriatrician, 10: Internal medicine-elderly, 11: Internal medicine, 12: Nursing home physician                  |
| <i>Transferred patient</i>                                                           | Process       | Factor                | 0: No, 1: Yes, 9: Unknown                                                                                                                                                                  |
| <i>Type of geriatric involvement</i>                                                 | Process       | Factor                | 0: None, 1: Post-operative consult, 2: Peri-operative shared, 3: Shared geriatric-traumatology ward                                                                                        |
| <i>Date and time of departure Emergency Room</i>                                     | Process       | dd-mm-yyyy hh:mm      |                                                                                                                                                                                            |
| <i>Pre-fracture living setting</i>                                                   | Patient       | Factor                | 1: Home, 2: Home with help in daily living, 3: Nursing home, 4: Revalidation, 7: other                                                                                                     |
| <i>Pre-fracture Fracture Mobility Score</i>                                          | Patient       | Integer               | 1 to 5                                                                                                                                                                                     |
| <i>Pre-fracture KATZ6-ADL dependency score</i>                                       | Patient       | Integer               | 0 to 6                                                                                                                                                                                     |
| <i>Known with dementia</i>                                                           | Patient       | Factor                | 0: No, 1: Yes, 9: Unknown                                                                                                                                                                  |
| <i>Known wit osteoporosis</i>                                                        | Patient       | Factor                | 0: No, 1: Yes, 9: Unknown                                                                                                                                                                  |
| <i>SNAQ or MUST-score for malnutrition</i>                                           | Patient       | Integer               |                                                                                                                                                                                            |
| <i>Fracture side</i>                                                                 | Patient       | Factor                | 1: Right, 2: left, 3: bilateral                                                                                                                                                            |
| <i>Fracture type</i>                                                                 | Patient       | Factor                | 1: Femoral neck undisplaced, 2: Femoral neck displaced, 3: Trochanteric AO-A1, 4: Trochanteric AO-A2, 5: Trochanteric AO-A3, 6: Subtrochanteric, 9: Unspecified                            |
| <i>ASA-class</i>                                                                     | Patient       | Factor                | 1 to 5                                                                                                                                                                                     |
| <i>Type of treatment</i>                                                             | Process       | Factor                | 1: Conservative, 2: Hemiarthroplasty, 3: Cannulated screws, 4: Total hip arthroplasty, 5: Sliding hip screw, 6: Intramedullary nailing, 10: Girdle stone.                                  |
| <i>Date and time of start of Operation</i>                                           | Process       | dd-mm-yyy hh:mm       |                                                                                                                                                                                            |
| <i>Augmentation used</i>                                                             | Process       | Factor                | 0: No, 1: Yes                                                                                                                                                                              |
| <i>Anesthesia complete</i>                                                           | Process       | Factor                | 0: No, 1: Yes                                                                                                                                                                              |
| <i>Anesthesia regional</i>                                                           | Process       | Factor                | 0: No, 1: Yes                                                                                                                                                                              |
| <i>Anesthesia spinal</i>                                                             | Process       | Factor                | 0: No, 1: Yes                                                                                                                                                                              |
| <i>Complication in general</i>                                                       | Outcome       | Factor                | 0: No, 1: Yes                                                                                                                                                                              |
| <i>Specific complication: anemia</i>                                                 | Outcome       | Factor                | 0: No, 1: Yes                                                                                                                                                                              |
| <i>Specific complication: cardiac decompensation</i>                                 | Outcome       | Factor                | 0: No, 1: Yes                                                                                                                                                                              |
| <i>Specific complication: pressure ulcers</i>                                        | Outcome       | Factor                | 0: No, 1: Yes                                                                                                                                                                              |
| <i>Specific complication: delirium</i>                                               | Outcome       | Factor                | 0: No, 1: Yes                                                                                                                                                                              |
| <i>Specific complication: pulmonary embolism</i>                                     | Outcome       | Factor                | 0: No, 1: Yes                                                                                                                                                                              |
| <i>Specific complication: renal failure/insufficiency</i>                            | Outcome       | Factor                | 0: No, 1: Yes                                                                                                                                                                              |
| <i>Specific complication: pneumonia</i>                                              | Outcome       | Factor                | 0: No, 1: Yes                                                                                                                                                                              |
| <i>Specific complication: urinary tract infection</i>                                | Outcome       | Factor                | 0: No, 1: Yes                                                                                                                                                                              |
| <i>Specific complication: fall during admission</i>                                  | Outcome       | Factor                | 0: No, 1: Yes                                                                                                                                                                              |
| <i>Specific complication: wound infection</i>                                        | Outcome       | Factor                | 0: No, 1: Yes                                                                                                                                                                              |
| <i>In-hospital mortality</i>                                                         | Outcome       | Factor                | 0: No, 1: Yes                                                                                                                                                                              |
| <i>Date of discharge</i>                                                             | Process       | dd-mm-yyyy            |                                                                                                                                                                                            |
| <i>Osteoporosis screening planned at moment of discharge</i>                         | Process       | Factor                | 0: No, 1: Yes                                                                                                                                                                              |
| <i>Discharge destination</i>                                                         | Process       | Factor                | 1: Home, 2: Home with help in daily living, 3: Nursing home, 4: Revalidation, 7: Other                                                                                                     |
| <b>FOLLOW-UP SECTION</b>                                                             |               |                       |                                                                                                                                                                                            |
| <i>Date of follow-up information gained</i>                                          | Process       | dd-mm-yyyy            |                                                                                                                                                                                            |
| <i>Deceased &lt; 3 months</i>                                                        | Outcome       | Factor                | 0: No, 1: Yes, 9: Unknown                                                                                                                                                                  |
| <i>Reoperation</i>                                                                   | Outcome       | Factor                | 0: No, 1: Yes, 9: Unknown                                                                                                                                                                  |
| <i>Reason for reoperation (if applicable)</i>                                        | Outcome       | Factor                | 1: Infection, 2: Dislocated device, 3: Peri-prosthetic fracture, 4: Hematoma, 5: Loosening of device, 6: Luxation of endoprosthesis, 7: Operative treatment after conservative, 9: Unknown |
| <i>Date of reoperation (if applicable)</i>                                           | Outcome       | dd-mm-yyyy            |                                                                                                                                                                                            |
| <i>Living situation at three months</i>                                              | Outcome       | Factor                | 1: Home, 2: Home with help in daily living, 3: Nursing home, 4: Revalidation, 7: Other                                                                                                     |
| <i>Mobility score at three months</i>                                                | Outcome       | Integer               | 1 to 5                                                                                                                                                                                     |
| <i>KATZ6-ADL dependency score at three months</i>                                    | Outcome       | Integer               | 0 to 6                                                                                                                                                                                     |
| <b>Suggested additions after methodological testing and expert panel discussion:</b> |               |                       |                                                                                                                                                                                            |
| <i>Serum Hemoglobin at admittance (in mmol/L)</i>                                    | Patient       | Integer (one decimal) |                                                                                                                                                                                            |
| <i>Polypharmacy at admittance (use of &gt;5 medications)</i>                         | Patient       | Factor                | 0: No, 1: Yes, 9: Unknown                                                                                                                                                                  |
| <i>Delirium screening: Known problems with memorization</i>                          | Patient       | Factor                | 0: No, 1: Yes, 9: Unknown                                                                                                                                                                  |
| <i>Delirium screening: Help needed in daily living in last 24h</i>                   | Patient       | Factor                | 0: No, 1: Yes, 9: Unknown                                                                                                                                                                  |
| <i>Delirium screening: Confusion in prior sickness or hospitalization</i>            | Patient       | Factor                | 0: No, 1: Yes, 9: Unknown                                                                                                                                                                  |

KATZ-6 ADL: KATZ Index of Activities of Daily Living [1]  
 ASA-score: American Society of Anesthesiologist physical status classification [2]  
 SNAQ: Short Nutritional Assessment Questionnaire [3]  
 MUST: Malnutrition Universal Screening Tool [4]

**Supplemental Table 2. Definitions used to register complications in the Dutch Hip Fracture Audit Dataset**

| Variable                    | Definition used                                                                                                                                                                                                                                                                                                                                                                                                                                                                                                                                                                                                                                                                                                                                                                                                                                                                                                                 |
|-----------------------------|---------------------------------------------------------------------------------------------------------------------------------------------------------------------------------------------------------------------------------------------------------------------------------------------------------------------------------------------------------------------------------------------------------------------------------------------------------------------------------------------------------------------------------------------------------------------------------------------------------------------------------------------------------------------------------------------------------------------------------------------------------------------------------------------------------------------------------------------------------------------------------------------------------------------------------|
| Anemia                      | Indication for blood transfusion according to the 4-5-6 rule deducted from the Dutch Transfusion Guideline, 2011:<br>Hb <4 mmol/L:<br>- Acute blood loss in ASA-I patients, <60 years old, normovolemic, blood loss at 1 locus.<br>Hb <5 mmol/L:<br>- Acute blood loss in ASA-I patients, >60 years old, normovolemic, blood loss at 1 locus<br>- Acute blood loss in ASA-I patients, <60 years old, normovolemic, blood loss at >1 locus. (polytrauma patients)<br>- Patient <60 years old, preoperatively in case of an expected blood loss >500 mL<br>- Fever<br>- Postoperatively after uncomplicated open cardiac surgery<br>- ASA II en ASA III<br>Hb <6 mmol/L:<br>- ASA-IV patients<br>- Patients not able to increase the cardiac minute volume in compensation of hemodilution.<br>- Septic/toxic patient.<br>- Patients with severe pulmonary disease.<br>- Patients with symptomatic cerebrocardiovascular disease. |
| Cardiac decompensation      | Indication to start diuretics AND<br>Clinical presentation of cardiac decompensation (dyspnea, tachypnoea, pulmonary crepitations, elevated central venous pressure, edema, enlarged liver, enlarged ictus, cardiac murmur, 3 <sup>rd</sup> heart sound AND/OR<br>Elevated proBNP or signs of pulmonary congestion on x-thorax.                                                                                                                                                                                                                                                                                                                                                                                                                                                                                                                                                                                                 |
| Pressure ulcers             | Open skin, pressure sores from grade 2-4, definition by Shea et al. [5]                                                                                                                                                                                                                                                                                                                                                                                                                                                                                                                                                                                                                                                                                                                                                                                                                                                         |
| Delirium                    | Diagnosed in concordance with the Diagnostic and Statistical Manual of Mental Disorders (DSM-5) criteria and noted in the clinical record. [6]                                                                                                                                                                                                                                                                                                                                                                                                                                                                                                                                                                                                                                                                                                                                                                                  |
| Pulmonary embolism          | Diagnosed pulmonary embolism as described in the guideline 'Antitrombotic therapy' [7]                                                                                                                                                                                                                                                                                                                                                                                                                                                                                                                                                                                                                                                                                                                                                                                                                                          |
| Renal failure/insufficiency | Decrease in renal function (Increase in serum creatine $\geq 26,5$ $\mu\text{mol/l}$ in 48h or increase of $\geq 1.5$ times the baseline concentration in 7 days)                                                                                                                                                                                                                                                                                                                                                                                                                                                                                                                                                                                                                                                                                                                                                               |
| Pneumonia                   | Clinical presentation of pneumonia, for which antibiotic therapy is initiated.                                                                                                                                                                                                                                                                                                                                                                                                                                                                                                                                                                                                                                                                                                                                                                                                                                                  |
| Urinary tract infection     | Clinical presentation of urinary tract infection, for which antibiotic therapy is initiated.                                                                                                                                                                                                                                                                                                                                                                                                                                                                                                                                                                                                                                                                                                                                                                                                                                    |
| Fall during admission       | Unintentionally coming to the ground or some lower level, definition by the Kellogg International Work Group [8]                                                                                                                                                                                                                                                                                                                                                                                                                                                                                                                                                                                                                                                                                                                                                                                                                |
| Wound infection             | Clinically presentation of wound infection for which antibiotic therapy is initiated.                                                                                                                                                                                                                                                                                                                                                                                                                                                                                                                                                                                                                                                                                                                                                                                                                                           |

**References**

1. Katz S, Ford AB, Moskowitz RW, et al (1963) Studies of Illness in the Aged: The Index of ADL: A Standardized Measure of Biological and Psychosocial Function. JAMA J Am Med Assoc 185:914–919. <https://doi.org/10.1001/jama.1963.03060120024016>
2. ASA Physical Status Classification System | American Society of Anesthesiologists (ASA). <https://www.asahq.org/standards-and-guidelines/asa-physical-status-classification-system>. Accessed 25 Jan 2021
3. Kruijenga HM, Seidell JC, de Vet HCW, et al (2005) Development and validation of a hospital screening tool for malnutrition: The short nutritional assessment questionnaire (SNAQ®). Clin Nutr 24:75–82. <https://doi.org/10.1016/j.clnu.2004.07.015>
4. Elia M (2001) The Malnutrition Advisory Group consensus guidelines for the detection and management of malnutrition in the community. Nutr Bull 26:81–83. <https://doi.org/10.1046/j.1467-3010.2001.00111.x>
5. Shea JD (1975) Pressure sores: classification and management. Clin Orthop Relat Res 89–100
6. APA (2013) American Psychiatric Association, 2013. Diagnostic and statistical manual of mental disorders (5th ed.)
7. Startpagina - Antitrombotisch beleid - Richtlijn - Richtlijndatabase. [https://richtlijndatabase.nl/richtlijn/antitrombotisch\\_beleid/antitrombotisch\\_beleid\\_-\\_korte\\_beschrijving.html](https://richtlijndatabase.nl/richtlijn/antitrombotisch_beleid/antitrombotisch_beleid_-_korte_beschrijving.html). Accessed 13 Apr 2022
8. Kellogg International Work Group (1987) The prevention of falls in later life. A report of the Kellogg International Work Group on the Prevention of Falls by the Elderly. Dan Med Bull 34 Suppl 4:1–24
